# Supplementary material for: Erratum to: Distilling the essence of appraisal: a mixed methods study of people with multiple sclerosis
Source: Springer Nature journal article supplement (doi:10.1007/s11136-016-1253-2), 2016-03-19
Supplement: MOESM1 [file 10682870]

## Sheet: SuppT1_Coded QOL&Goal Attri
	Supplementary Table 1: QOL Definition and Goal Attributes Coded in the QOLAP
	QOL Definition Attribute	Goal Attribute
	Circumstances	Accomplishing Chores and Tasks
	Contentment	Community Involvement and Voluntarism
	Contribution	Drug and Alcohol Use
	Family / friends	Education
	Health	Existential and End of Life Concerns
	Independence	Fantasy
	Non-answer	Financial Concerns
	Personal Growth	Health Issues
	Positive Attitude	HIV/AIDS Related Goals
	Problems	Immigration and Citizenship
	Provider-related	Independent Functioning
	Reminiscence	Interpersonal Relationships
	Survival	Involvement in Community Outreach
	Treatment-related	Legal and Crime Concerns
		Leisure Activities
	Complexity-related themes:	Living Situation, Housing, Neighborhood
	Is vs. Not	Mental Health and Mood State
	Self vs. Others	Provider and Treatment Related Concerns
		Racism
		Religious and Spiritual Concerns
		Self-Image and Personality
		Societal and Altruistic Concerns
		Travel
		Work and Unemployment

## Sheet: SuppT2_Std Model Regressions
	Supplementary Table 2: Summary of Standard Model Regression Analyses
	Outcome	Covariate	Coeffient	p-value	R-squared
	PCS				0.17
		Age	-0.211614	0
		Gender	2.95176	0.001
		Employed	6.86118	0
		Married	1.45657	0.07
		Disability trajectory	-3.98439	0.001
	PS Summary				0.148
		Age	0.0737902	0.011
		Gender	-1.47413	0.012
		Employed	-5.18702	0
		Married	-1.34692	0.014
		Disability trajectory	1.70971	0.038
	MCS				0.0421
		Age	0.194057	0
		Gender	-0.335184	0.694
		Employed	3.49187	0
		Married	1.61349	0.044
		Disability trajectory	0.254051	0.833
	Programmer: Bruce Rapkin
	Program: Ask Bruce. I do not have it.
	Output: All Manova and Discriminant findings.xlsx (in Bruce's analysis folder)

## Sheet: Supp T3_MANOVAs
	Supplementary Table 3: Preliminary MANOVA analyses to identify appraisal measures related to QOL outcomes
	QOL Outcome	Appraisal Measures	Expected Main Effect		Residual Main Effect						Expected x Residual
		Domain (N Variables)	Wilks λ	Variables	Wilks λ	Variables					Wilks λ	Variables
	PCS	QOL Definition (14)	.958 p<.09	2	.980 ns	0					.938 ns	0
		Personal Goals (31)	.792 p<.01	8	.901 p<.01	5					.895 ns	2
		Sample Experience (14)	.951 p<.05	1	.896 p<.01	5					.922 ns	1
		Standards of Comparison (8)	.965 p<.02	1	.940 p<.01	1					.949 p<.08	0
		Combinatory (16)	.897 p<.01	6	.868 p<.01	6					.936 ns	2
	PS Summary	QOL Definition (14)	.965 ns	0	.959 ns	0					.949 ns	0
		Personal Goals (31)	.782 p<0.001	7	.927 ns	3					.910 ns	0
		Sample Experience (14)	.934 p<.001	3	.878 p<.001	6					.932 ns	0
		Standards of Comparison (8)	.963 p<.02	2	.924 p<.001	5					.956 ns	2
		Combinatory (16)	.893 p<.001	7	.841 p<.001	9					.934 ns	1
	MCS	QOL Definition (14)	.979 ns	0	.966 ns	0					.953 ns	0
		Personal Goals (31)	.915 p<.02	2	.927 ns	4					.892 ns	1
		Sample Experience (14)	.932 p<.001	4	.820 p<.001	8					.932 ns	1
		Standards of Comparison (8)	.961 p<.01	3	.958 p<0.01	6					.957 ns	2
		Combinatory (16)	.941 p<.02	4	.832 p<.001	10					.932 ns	0
				18		17
				19		23
				13		28
				50
				0.60241
	Programmer: Bruce Rapkin
	Program: Ask Bruce. I do not have it.
	Output: All Manova and Discriminant findings.xlsx (in Bruce's analysis folder)

## Sheet: Supp T4_PCS_Appraisal_Means
	Supplementary Table 4: PCS mean differences in appraisal
		Baseline PCS was expected to be:				Compared to expected, patient’s PCS was:				Two-Way
		Poor	Mid	Good	Sig.	Worse	Same	Better	Sig.	Sig.
	QOL Definition
	Problems	0.01	0.01	0.03	0.031	0.02	0.02	0.01
	Reminiscence	0.02	0.01	0.04	0.014	0.02	0.02	0.02
	Personal Goals Themes
	Financial	0.38	0.59	0.62	0.002	0.48	0.52	0.58
	Health	1.54	1.44	1.34		1.6	1.46	1.27	0.01
	Independent functioning	0.98	0.81	0.68	0.007	1.02	0.86	0.57	0
	Relationships	1.34	1.69	1.74	0	1.54	1.56	1.68
	Mental health/ mood state	0.35	0.33	0.38		0.38	0.27	0.42	0.02	0.008
	MS-Related	0.45	0.39	0.39		0.44	0.52	0.27	0.001
	Self-Image and personality	0.1	0.09	0.13		0.06	0.12	0.15	0.009	0.041
	Travel	0.06	0.07	0.14	0.01	0.08	0.1	0.09
	Work and unemployment	0.15	0.36	0.9	0	0.4	0.45	0.56
	Achievement	0.02	0.05	0.02	0.044	0.02	0.04	0.04
	Education	0.02	0.04	0.07	0.049	0.05	0.04	0.05
	Non-Answer	1.82	1.59	1.39	0.006	1.58	1.61	1.6
	Sampling Experience
	The past few weeks	2.5	2.5	2.69	0.046	2.55	2.6	2.54
	Recent flare ups	1.61	1.68	1.7		1.87	1.75	1.37	0
	The future	2.72	2.71	2.74		2.85	2.66	2.66		0.01
	Focus on MS	2.26	2.35	2.4		2.62	2.32	2.07	0
	Relationships	3.07	3.15	3.11		3.22	3.07	3.04	0.038
	Seriousness of situation	1.99	2.16	2.01		2.27	2.09	1.8	0
	The worst moments	1.48	1.61	1.42		1.69	1.49	1.32	0
	Standards of Comparison
	Life I am working for	2.2	2.38	2.52	0.004	2.36	2.4	2.35		0.076
	Before MS	2.05	2.1	2		2.37	2.02	1.75	0
	Combinatory Algorithm
	How hard it has been	0.41	0.41	0.31	0.046	0.52	0.38	0.23	0
	How well I am doing	0.76	0.76	0.84		0.73	0.81	0.82	0.022	0.07
	Disappointments	0.44	0.45	0.36		0.51	0.41	0.33	0
	Recent concerns	0.54	0.56	0.68	0.001	0.63	0.59	0.56		0.018
	Long-time concerns	0.6	0.63	0.65		0.69	0.62	0.57	0.011
	Help needed	0.44	0.37	0.27	0.001	0.52	0.37	0.18	0
	What I do on my own	0.79	0.79	0.83		0.79	0.82	0.8		0.039
	Important to you	0.74	0.72	0.83	0.003	0.78	0.75	0.77
	Important to others	0.45	0.43	0.29	0	0.44	0.39	0.34
	Things that worry me	0.42	0.52	0.55	0.005	0.51	0.49	0.49
	Things that are unfinished	0.6	0.59	0.58		0.67	0.58	0.51	0.001
	Programmer: Bruce Rapkin
	Program: Ask Bruce. I do not have it.
	Output: All Manova and Discriminant findings.xlsx (in Bruce's analysis folder)

## Sheet: Supp T5_PSSum_Appraisal_Means
	Supplementary Table 5: PS Summary mean differences in appraisal
		Baseline PS Summary was expected to be:				Compared to expected, patient’s PS Summary was:				Two-Way
		Poor	Mid	Good	Sig.	Worse	Same	Better	Sig.	Sig.
	Personal Goals Themes
	Financial	0.64	0.53	0.42	0.016	0.52	0.5	0.56
	Independent functioning	0.68	0.82	0.97	0.004	0.65	0.81	1	0
	Relationships	1.72	1.72	1.34	0	1.63	1.68	1.46
	Living Situation / Housing	0.17	0.24	0.26		0.18	0.2	0.28	0.047
	MS-Related	0.41	0.39	0.44		0.35	0.38	0.5	0.036
	Travel	0.13	0.08	0.06	0.012	0.08	0.08	0.1
	Work and unemployment	0.91	0.32	0.18	0	0.51	0.45	0.44
	Achievement	0.02	0.05	0.02	0.049	0.04	0.03	0.02
	Non-Answer	1.42	1.56	1.82	0.008	1.7	1.63	1.47
	Sampling Experience
	The worst moments	1.42	1.56	1.51		1.22	1.5	1.78	0
	Emphasize the positive	2.92	2.93	3		3.13	2.91	2.81	0
	Recent flare-ups	1.66	1.68	1.64		1.29	1.74	1.96	0
	Focus on MS	2.4	2.37	2.23		1.99	2.41	2.6	0
	Relationships	3.11	3.2	3.01	0.025	3.01	3.13	3.19	0.035
	Not complain too much	2.78	2.87	3	0.049	2.83	2.89	2.93
	Seriousness of situation	1.99	2.18	1.99	0.047	1.81	2.09	2.25	0
	Standards of Comparison
	Others w/o health limits	1.79	1.85	1.71		1.72	1.68	1.95	0.024
	Things my doctor told me	0.86	1.02	1.02		0.89	0.91	1.1	0.017
	Ideal of perfect health	2.08	2.05	1.93		1.88	2.02	2.14	0.037
	Life I am working for	2.49	2.36	2.24	0.026	2.33	2.31	2.44
	The way others see me	1.75	1.96	1.73	0.037	1.68	1.78	1.99	0.005	0.017
	Most people your age	1.79	1.75	1.68		1.77	1.65	1.8		0.013
	Before MS	1.99	2.09	2.06		1.69	2.1	2.35	0
	Combinatory Algorithm
	Big changes
	Big changes	0.26	0.31	0.33		0.28	0.25	0.38	0.003	0.037
	How hard it has been	0.29	0.41	0.42	0.001	0.24	0.36	0.53	0
	How well I am doing	0.84	0.78	0.74	0.025	0.81	0.83	0.72	0.003
	Disappointments	0.37	0.43	0.45		0.32	0.41	0.52	0
	Recent concerns	0.82	0.74	0.73	0.013	0.74	0.79	0.76
	Long-time concerns	0.28	0.44	0.44	0	0.34	0.39	0.44
	Help needed	0.54	0.51	0.44		0.43	0.5	0.56	0.006
	Important to you	0.66	0.56	0.56	0.012	0.53	0.63	0.61	0.03
	Important to others	0.66	0.63	0.58		0.54	0.64	0.7	0
	Things that worry me	0.27	0.36	0.44	0	0.19	0.35	0.53	0
	Things that are unfinished	0.56	0.59	0.6		0.49	0.57	0.7	0
	Programmer: Bruce Rapkin
	Program: Ask Bruce. I do not have it.
	Output: All Manova and Discriminant findings.xlsx (in Bruce's analysis folder)

## Sheet: Supp T6_MCS_Appraisal_Means
	Supplementary Table 6: MCS mean differences in appraisal
		Baseline MCS was expected to be:				Compared to expected, patient’s MCS was:				Two-Way
		Poor	Mid	Good	Sig.	Worse	Same	Better	Sig.	Sig.
	Personal Goals Themes
	Education	0.0736842	0.0348432	0.0179211	0.00891031	0.0385965	0.045614	0.0427046
	Financial	0.501754	0.473868	0.609319		0.642105	0.477193	0.462633	0.0255048
	Independent Functioning	0.894737	0.794425	0.774194		0.849123	0.785965	0.829181		0.0194756
	Mental Health/Mood State	0.4	0.324042	0.340502		0.414035	0.382456	0.266904	0.0267237
	Religious/Spirituality	0.129825	0.0662021	0.0967742		0.0350877	0.108772	0.149466	0.00455197
	Work and Unemployment	0.347368	0.404181	0.666667	8.58483e-06	0.445614	0.57193	0.395018	0.039745
	Sampling Experience
	The worst moments	1.64211	1.47387	1.37993	0.00444047	1.86667	1.44912	1.17794	6.70231e-17
	Emphasize the positive	2.85263	2.98258	3.01075		2.60702	2.9614	3.28114	2.48332e-19
	The past few weeks	2.63158	2.49129	2.56989		2.78246	2.48772	2.41993	2.18958e-05
	Balance positive & negative	2.54737	2.70383	2.65591		2.30877	2.67018	2.93238	4.65377e-12
	Recent flare ups	1.8386	1.56446	1.58423	0.007145	1.9614	1.58246	1.44128	2.24129e-07
	Focus on MS	2.45263	2.33449	2.22222	0.0450863	2.50175	2.35088	2.15658	0.000926414
	Your first reaction to questions	3.07018	3.10105	3.14695		3.03158	3.07719	3.20996	0.0410742
	Try not to complain too much	2.95439	2.78397	2.91039		2.7614	2.87018	3.01779	0.0212322	0.0336672
	Seriousness of situation	2.24912	2.09408	1.8172	1.25507e-05	2.13684	2.01053	2.01779
	Standards of Comparison
	Other people living with MS	1.12281	1.06272	1.319	0.0151386	1.24912	1.19649	1.05338		0.0186935
	People without health limits	1.81053	1.68641	1.85305		1.95088	1.78246	1.6121	0.00598864
	Things your doctor told you	1.06316	0.89547	0.946237		1.14737	0.887719	0.868327	0.000602057
	Your ideal of perfect health	2.18246	1.9547	1.92115	0.0228912	2.16491	1.98596	1.90747	0.0395492
	The way that others see you	1.85614	1.74564	1.84229		2.04912	1.73333	1.65836	0.000131734
	Most people your age	1.75088	1.6446	1.82796		1.87368	1.71579	1.62989	0.0353466
	A time in your past before MS	2.21404	1.87108	2.06093	0.00569628	2.26667	1.94035	1.93594	0.001881	0.0209161
	Combinatory Algorithm
	The way things usually are	0.8	0.707317	0.774194	0.027976	0.77193	0.792982	0.715302
	Big changes	0.322807	0.317073	0.272401		0.361404	0.245614	0.30605	0.0125961
	How hard it has been	0.435088	0.351916	0.336918	0.0375967	0.508772	0.340351	0.274021	1.57593e-08
	How well you are doing	0.775439	0.804878	0.777778		0.719298	0.824561	0.814947	0.00322825
	Things that are disappointing	0.477193	0.432056	0.340502	0.00373208	0.575439	0.382456	0.291815	1.41995e-11
	Things that you are proud of	0.631579	0.700348	0.727599	0.0402752	0.638596	0.691228	0.729537
	Things that make you calm	0.57193	0.512195	0.55914		0.473684	0.557895	0.6121	0.00370108
	Things that make you worried	0.505263	0.505226	0.480287		0.673684	0.45614	0.359431	8.18929e-14
	Long-time concerns	0.649123	0.585366	0.65233		0.684211	0.677193	0.523132	3.98574e-05
	Help you need from others	0.4	0.327526	0.344086		0.431579	0.315789	0.323843	0.00612229
	Things that are settled	0.45614	0.442509	0.458781		0.392982	0.494737	0.469751	0.0427092
	Things that are unfinished	0.621053	0.574913	0.566308		0.708772	0.585965	0.466192	2.75193e-08
	Programmer: Bruce Rapkin
	Program: Ask Bruce. I do not have it.
	Output: All Manova and Discriminant findings.xlsx (in Bruce's analysis folder)

## Sheet: Supp T7_Corr_Discrim Func
Supplemental Table 7: Correlations among Discriminant Functions
		PCS_EXP_DF1 Discriminant Scores from Function 1 for Analysis 1	PCS_EXP_DF2 Discriminant Scores from Function 2 for Analysis 1	PCS_RES_DF1 Discriminant Scores from Function 1 for Analysis 1	PCS_RES_DF2 Discriminant Scores from Function 2 for Analysis 1	MCS_EXP_DF1 Discriminant Scores from Function 1 for Analysis 1	MCS_EXP_DF2 Discriminant Scores from Function 2 for Analysis 1	MCS_RES_DF1 Discriminant Scores from Function 1 for Analysis 1	MCS_RES_DF2 Discriminant Scores from Function 2 for Analysis 1	PSSUM_EXP_DF1 Discriminant Scores from Function 1 for Analysis 1	PSSUM_EXP_DF2 Discriminant Scores from Function 2 for Analysis 1	PSSUM_RES_DF1 Discriminant Scores from Function 1 for Analysis 1	PSSUM_RES_DF2 Discriminant Scores from Function 2 for Analysis 1
PCS_EXP_DF1 Discriminant Scores from Function 1 for Analysis 1	Pearson Correlation	1	-0.000893745	-.216**	-0.00600895	-.432**	.193**	.080*	.385**	.955**	0.0563732	-.170**	-.114**
	Sig. (2-tailed)		0.979157	1.64123e-10	0.860566	3.14617e-40	1.29051e-08	0.0194326	1.19734e-31	0	0.0991057	5.18047e-07	0.000868608
	N	857	857	857	857	857	857	857	857	857	857	857	857
PCS_EXP_DF2 Discriminant Scores from Function 2 for Analysis 1	Pearson Correlation	-0.000893745	1	-.067*	-0.0549466	0.0267502	0.0357288	.169**	-.117**	0.00762599	.691**	-0.0134628	0.0335778
	Sig. (2-tailed)	0.979157		0.0486191	0.107965	0.434157	0.296138	6.0403e-07	0.000607704	0.823594	8.77907e-123	0.693906	0.326189
	N	857	857	857	857	857	857	857	857	857	857	857	857
PCS_RES_DF1 Discriminant Scores from Function 1 for Analysis 1	Pearson Correlation	-.216**	-.067*	1	0.000690807	.380**	.262**	.388**	-.109**	-.267**	-0.0139359	.891**	0.0607705
	Sig. (2-tailed)	1.64123e-10	0.0486191		0.983889	7.05591e-31	6.85146e-15	4.12164e-32	0.00139644	2.06371e-15	0.68372	3.05166e-296	0.0753914
	N	857	857	857	857	857	857	857	857	857	857	857	857
PCS_RES_DF2 Discriminant Scores from Function 2 for Analysis 1	Pearson Correlation	-0.00600895	-0.0549466	0.000690807	1	0.0349329	-.105**	-.096**	-.079*	-0.0187726	-0.00948577	0.026987	-.179**
	Sig. (2-tailed)	0.860566	0.107965	0.983889		0.307035	0.00201468	0.00512069	0.0206922	0.583139	0.781555	0.430098	1.33929e-07
	N	857	857	857	857	857	857	857	857	857	857	857	857
MCS_EXP_DF1 Discriminant Scores from Function 1 for Analysis 1	Pearson Correlation	-.432**	0.0267502	.380**	0.0349329	1	-7.42881e-05	.236**	-.255**	-.526**	.257**	.305**	0.00666878
	Sig. (2-tailed)	3.14617e-40	0.434157	7.05591e-31	0.307035		0.998267	2.57089e-12	3.64799e-14	2.90205e-62	2.10092e-14	6.0295e-20	0.845438
	N	857	857	857	857	857	857	857	857	857	857	857	857
MCS_EXP_DF2 Discriminant Scores from Function 2 for Analysis 1	Pearson Correlation	.193**	0.0357288	.262**	-.105**	-7.42881e-05	1	.205**	.212**	.161**	0.00120531	.294**	-.160**
	Sig. (2-tailed)	1.29051e-08	0.296138	6.85146e-15	0.00201468	0.998267		1.30068e-09	3.61891e-10	2.05543e-06	0.971894	1.52706e-18	2.64987e-06
	N	857	857	857	857	857	857	857	857	857	857	857	857
MCS_RES_DF1 Discriminant Scores from Function 1 for Analysis 1	Pearson Correlation	.080*	.169**	.388**	-.096**	.236**	.205**	1	-5.06652e-05	-0.0298832	0.026666	.536**	.131**
	Sig. (2-tailed)	0.0194326	6.0403e-07	4.12164e-32	0.00512069	2.57089e-12	1.30068e-09		0.998818	0.382263	0.435605	6.7787e-65	0.000122255
	N	857	857	857	857	857	857	857	857	857	857	857	857
MCS_RES_DF2 Discriminant Scores from Function 2 for Analysis 1	Pearson Correlation	.385**	-.117**	-.109**	-.079*	-.255**	.212**	-5.06652e-05	1	.408**	-0.020892	-.080*	-.296**
	Sig. (2-tailed)	1.19734e-31	0.000607704	0.00139644	0.0206922	3.64799e-14	3.61891e-10	0.998818		1.10801e-35	0.541347	0.0195484	8.86509e-19
	N	857	857	857	857	857	857	857	857	857	857	857	857
PSSUM_EXP_DF1 Discriminant Scores from Function 1 for Analysis 1	Pearson Correlation	.955**	0.00762599	-.267**	-0.0187726	-.526**	.161**	-0.0298832	.408**	1	-0.000491013	-.231**	-.105**
	Sig. (2-tailed)	0	0.823594	2.06371e-15	0.583139	2.90205e-62	2.05543e-06	0.382263	1.10801e-35		0.988548	8.03304e-12	0.00205622
	N	857	857	857	857	857	857	857	857	857	857	857	857
PSSUM_EXP_DF2 Discriminant Scores from Function 2 for Analysis 1	Pearson Correlation	0.0563732	.691**	-0.0139359	-0.00948577	.257**	0.00120531	0.026666	-0.020892	-0.000491013	1	-0.061744	-0.0384939
	Sig. (2-tailed)	0.0991057	8.77907e-123	0.68372	0.781555	2.10092e-14	0.971894	0.435605	0.541347	0.988548		0.0708225	0.260308
	N	857	857	857	857	857	857	857	857	857	857	857	857
PSSUM_RES_DF1 Discriminant Scores from Function 1 for Analysis 1	Pearson Correlation	-.170**	-0.0134628	.891**	0.026987	.305**	.294**	.536**	-.080*	-.231**	-0.061744	1	-0.000608152
	Sig. (2-tailed)	5.18047e-07	0.693906	3.05166e-296	0.430098	6.0295e-20	1.52706e-18	6.7787e-65	0.0195484	8.03304e-12	0.0708225		0.985816
	N	857	857	857	857	857	857	857	857	857	857	857	857
PSSUM_RES_DF2 Discriminant Scores from Function 2 for Analysis 1	Pearson Correlation	-.114**	0.0335778	0.0607705	-.179**	0.00666878	-.160**	.131**	-.296**	-.105**	-0.0384939	-0.000608152	1
	Sig. (2-tailed)	0.000868608	0.326189	0.0753914	1.33929e-07	0.845438	2.64987e-06	0.000122255	8.86509e-19	0.00205622	0.260308	0.985816
	N	857	857	857	857	857	857	857	857	857	857	857	857
**. Correlation is significant at the 0.01 level (2-tailed).
*. Correlation is significant at the 0.05 level (2-tailed).
Programmer: Bruce Rapkin
Program: Ask Bruce. I do not have it.
Output: All Manova and Discriminant findings.xlsx (in Bruce's analysis folder)

## Sheet: Supp Figures 1a&b_PCS
	Figure 1a
	Figure 1b
									As expected are using problem-focused coping.
									Both better than and worse than expected are using emotion-focused coping.
									Know that they are doing emotion-focused coping better and that they are doing better, so assume/infer they are doing the emotion-focused coping better.
	Programmer: Bruce Rapkin
	Program: Ask Bruce. I do not have it.
	Output: All Manova and Discriminant findings.xlsx (in Bruce's analysis folder)

## Sheet: Supp Figures 2a&b_PS Summary
	Figure 2a
	Figure 2b
												Confirm tht Worse and Better are correct. I fixed figue 2a because PS high scores mean worse functioning. Should this be changed accordingly?
	Programmer: Bruce Rapkin
	Program: Ask Bruce. I do not have it.
	Output: All Manova and Discriminant findings.xlsx (in Bruce's analysis folder)

## Sheet: Supp Figures 3a&b_MCS
			Figure 3a
													need labels
													based on:
													Functions at Group Centroids
													MCSExpectedTertiles_s 3 quantiles of MCSExpected	Function
														1	2
													1	0.317906	0.140789
													2	0.0756909	-0.211036
													3	-0.399739	0.0727484
													Unstandardized canonical discriminant functions evaluated at group means
			Figure 3b
													need labels
													based on:
													Functions at Group Centroids
													MCSresidualstertiles_s 3 quantiles of MCSresiduals	Function
														1	2
													1	0.716463	-0.0938829
													2	-0.132602	0.267334
													3	-0.592171	-0.17592
													Unstandardized canonical discriminant functions evaluated at group means
			Programmer: Bruce Rapkin
			Program: Ask Bruce. I do not have it.
			Output: All Manova and Discriminant findings.xlsx (in Bruce's analysis folder)
